# Supplementary material for: Photoinduced ω-bond dissociation of m-halomethylbenzophenones studied by laser photolysis techniques and DFT calculations. Substituted position effects
Source: Royal Society of Chemistry journal article supplement (doi:10.1039/b702598j), 2007-01-01
Supplement: b702598j.pdf [file b702598j.pdf]

## Supplementary Information

# Photoinduced $\omega$ -Bond Dissociation of *m*-Halomethylbenzophenones Studied by Laser Photolysis Techniques and DFT Calculations. Substituted Position Effects

Minoru Yamaji,<sup>a,\*</sup> Michiyo Ogasawara,<sup>a</sup> Kazuhiro Kikuchi,<sup>a</sup> Satoru Nakajima,<sup>b</sup> Shozo Tero-Kubota,<sup>b</sup> Bronislaw Marciniak<sup>c</sup> and Koichi Nozaki<sup>d</sup>

<sup>a</sup>Department of Chemistry, Gunma University, Kiryu 376-8515, Japan

<sup>b</sup>Institute of Multidisciplinary Research for Advanced Materials, Tohoku University, Sendai 980-8577, Japan

<sup>c</sup>Faculty of Chemistry, Adam Mickiewicz University, Poznan 60-780, Poland

<sup>d</sup>Department of Chemistry, Graduate School of Science, Osaka University, Toyonaka, Osaka 560-0043, Japan

---

### *Transient absorption measurements of ortho-substituted benzophenones*

To understand the substitution position effects to  $\omega$ -cleavage, laser photolysis studies of ortho-HMBPs was carried out. *o*-Methylbenzophenone (*o*-MBP) was commercially purchased. *o*-Chloromethylbenzophenone (*o*-CMBP) was synthesized by a reaction of *o*-MBP with sulfuryl chloride in CCl<sub>4</sub> in the presence of benzoyl peroxide, and separated by passing through a silica-gel column with a mixture of hexane and benzene (5:1 v/v). *o*-Bromomethylbenzophenone (*o*-BMBP) was synthesized by a reaction of *o*-MBP with *N*-bromosuccinimide in benzene in the presence of benzoyl peroxide, but it seemed to decomposed upon separation on a silica-gel column. Therefore, we were unable to obtain *o*-BMBP. *o*-MBP and *o*-CMBP were purified by repeated recrystallizations from hexane.

Fig. S1 show the transient absorption spectra obtained upon 266 nm laser pulsing in *o*-MBP and *o*-CMBP in ACN at 295 K.

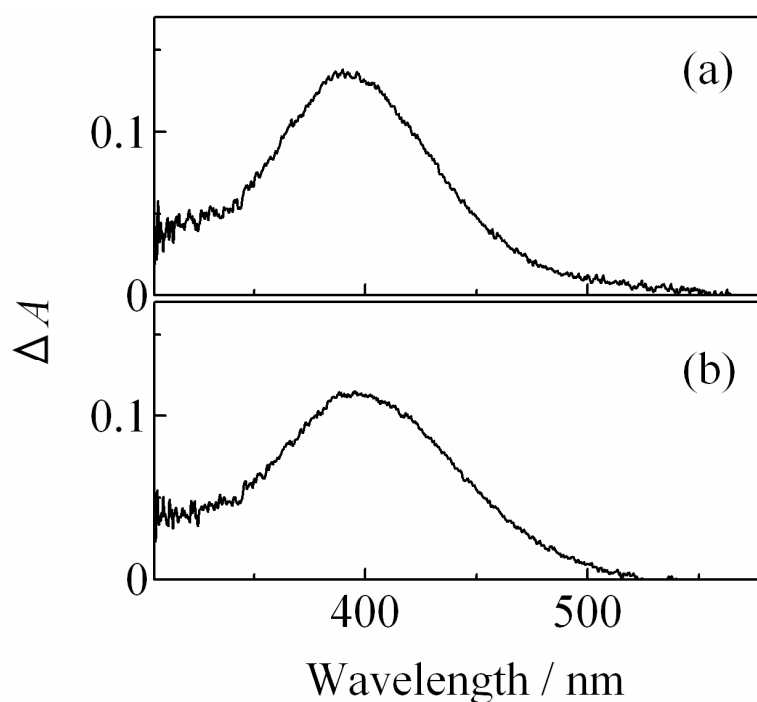

Fig. S1 Transient absorption spectra obtained at 500 ns upon 266 nm laser pulsing in *o*-MBP (a) and *o*-CMBP (b) in degassed acetonitrile at 295 K.

The obtained transient absorption spectra are similar to each other. It is well known that photoexcited *o*-MBP undergoes intramolecular H-atom abstraction in the triplet state to produce a biradical,<sup>1</sup> which forms the enol compounds within 26 ns.<sup>2</sup>

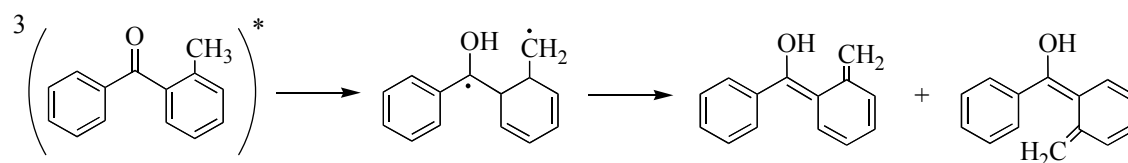

Therefore, the obtained transient absorption spectra are due to the corresponding enols. These observations indicate that  $\omega$ -cleavage is absent in excited *o*-CMBP.

### ***DFT calculation results***

Potential energies plotted in Fig. 5 in the text are numerated in Tables S1 and 2.

Table S1 Potential energies,  $E(S_1)$  and  $E(T_1)$  of the  $S_1$  and  $T_1$  states of BMBPs at a distance,  $d(\text{C-Br})$  between the benzylic carbon and Br atoms calculated at the B3LYP/6-311G(d) level.

| $d(\text{C-Br}) / \text{nm}$ | $E(S_1) / \text{kcal mol}^{-1}$ |            | $E(T_1) / \text{kcal mol}^{-1}$ |            |
|------------------------------|---------------------------------|------------|---------------------------------|------------|
|                              | <i>m</i> -                      | <i>p</i> - | <i>m</i> -                      | <i>p</i> - |
| 0.1900                       | 78.09                           | 76.92      | 66.57                           | -          |
| 0.1950                       | -                               | -          | -                               | 64.23      |
| 0.2000                       | -                               | 74.01      | -                               | -          |
| 0.2016                       | -                               | -          | 64.49                           | -          |
| 0.2020                       | 76.00                           | -          | -                               | -          |
| 0.2043                       | -                               | -          | -                               | 63.23      |
| 0.2100                       | 76.73                           | -          | 65.25                           | -          |
| 0.2120                       | -                               | 73.25      | -                               | -          |
| 0.2150                       | -                               | -          | -                               | 64.10      |
| 0.2200                       | 79.04                           | 73.39      | 67.57                           | -          |
| 0.2250                       | 80.52                           | -          | 69.09                           | 65.79      |
| 0.2300                       | 82.11                           | 73.72      | 68.35                           | 63.85      |
| 0.2350                       | 82.48                           | 73.91      | 65.92                           | 62.27      |
| 0.2400                       | 79.32                           | 74.42      | 63.78                           | -          |
| 0.2450                       | -                               | 74.39      | -                               | -          |

|        |       |       |       |       |
|--------|-------|-------|-------|-------|
| 0.2500 | 73.80 | 71.12 | 60.33 | 57.56 |
| 0.2600 | -     | -     | 57.81 | -     |

Table S2 Potential energies,  $E(S_1)$  and  $E(T_1)$  of the  $S_1$  and  $T_1$  states of CMBPs at a distance,  $d(\text{C-Cl})$  between the benzylic carbon and Cl atoms calculated at the B3LYP/6-311G(d) level.

| $d(\text{C-Cl}) / \text{nm}$ | $E(S_1) / \text{kcal mol}^{-1}$ |            | $E(T_1) / \text{kcal mol}^{-1}$ |            |
|------------------------------|---------------------------------|------------|---------------------------------|------------|
|                              | <i>m</i> -                      | <i>p</i> - | <i>m</i> -                      | <i>p</i> - |
| 0.1700                       | 79.98                           | -          | -                               | -          |
| 0.1740                       | -                               | 77.01      | 66.40                           | -          |
| 0.1750                       | -                               | -          | -                               | 65.43      |
| 0.1800                       | -                               | -          | -                               | 64.02      |
| 0.1840                       | 75.95                           | 74.95      | 64.49                           | 63.56      |
| 0.1900                       | -                               | -          | -                               | 63.79      |
| 0.2000                       | 78.82                           | 75.24      | 67.47                           | 65.57      |
| 0.2100                       | 82.36                           | 76.43      | 71.09                           | 68.21      |
| 0.2200                       | 86.35                           | 80.83      | 75.20                           | 70.96      |
| 0.2250                       | 88.36                           | -          | -                               | 69.32      |
| 0.2300                       | 88.94                           | 85.85      | 71.74                           | 67.90      |
| 0.2350                       | -                               | -          | 70.18                           | -          |
| 0.2400                       | 82.91                           | 80.18      | 68.83                           | 65.56      |
| 0.2500                       | -                               | -          | 66.82                           | 63.87      |
| 0.2600                       | 73.82                           | 71.56      | 65.46                           | 62.77      |

### References

- 1 T. Suzuki, T. Omori, T. Ichimura, *J. Phys. Chem. A*, 2000, **104**, 11671, and references cited therein.
- 2 T. Nakayama, K. Hamanoue, T. Hidaka, M. Okamoto, H. Teranishi, *J. Photochem.*, 1984, **24**, 71.
